# Supplementary material for: Genetic and Epigenetic Mechanisms of Longevity in Forest Trees
Source: MDPI journal article supplement (doi:10.3390/ijms241210403), 2023-06-20
Supplement: s1 [file s1]

**Table S1.** Genes with multiple signs of adaptive evolution (MSA) in *Ficus benghalensis* and *F. religiosa* [8].

| #                         | KEGG ID/ <i>Arabidopsis</i><br>ortholog ID | Gene name                                                                       |
|---------------------------|--------------------------------------------|---------------------------------------------------------------------------------|
| <i>Ficus benghalensis</i> |                                            |                                                                                 |
| 1                         | AT1G31440                                  | SH3P1 (SH3 domain-containing protein 1)                                         |
| 2                         | AT2G35100                                  | ARAD1 (Arabinan Deficient 1)                                                    |
| 3                         | AT1G08730                                  | XIC (Myosin XI C)                                                               |
| 4                         | AT5G12040                                  | Nitrilase/cyanide hydratase and apolipoprotein N-acyltransferase family protein |
| 5                         | AT5G41040                                  | Aliphatic suberin feruloyl-transferase                                          |
| 6                         | AT1G80410                                  | NAA15 (N-Alpha-Acetyltransferase 15)                                            |
| 7                         | AT1G16880                                  | ACR11 (ACT domain repeats 11)                                                   |
| 8                         | AT4G10380                                  | NIP5;1 (NOD26-like Intrinsic Protein 5;1)                                       |
| 9                         | AT1G22540                                  | NPF5.10 - Major facilitator superfamily protein                                 |
| 10                        | AT5G15810                                  | TRM1B (tRNA methyltransferase 1B)                                               |
| 11                        | AT2G38560                                  | RDO2 (Reduced dormancy 2)                                                       |
| 12                        | K13348                                     | Protein MPV17                                                                   |
| 13                        | AT5G24690                                  | Plant/protein, putative (DUF3411)                                               |
| 14                        | AT5G15900                                  | TBL19 (Trichome birefringence-like 19)                                          |
| 15                        | AT3G21180                                  | ACA9 - Autoinhibited Ca(2+)-ATPase 9                                            |
| 16                        | AT5G64816                                  | Thionin-like gene                                                               |
| 17                        | K00134                                     | GAPDH (Glyceraldehyde 3-phosphate dehydrogenase)                                |
| <i>Ficus religiosa</i>    |                                            |                                                                                 |
| 1                         | AT1G79000                                  | HAC1 (Histone Acetyltransferase 1)                                              |
| 2                         | AT4G04910                                  | NSF (N-Ethylmaleimide sensitive factor)                                         |
| 3                         | AT3G02130                                  | RPK2 (Receptor-like protein kinase 2)                                           |
| 4                         | AT3G63190                                  | HFP108                                                                          |
| 5                         | AT5G65310                                  | HB5 (Homeobox protein 5)                                                        |
| 6                         | AT1G08320                                  | TGA9 (TGACG (TGA) motif-binding protein 9)                                      |
| 7                         | AT3G19860                                  | BHLH121 (Basic helix-loop-helix 121)                                            |
| 8                         | K00134                                     | GAPDH (Glyceraldehyde 3-phosphate dehydrogenase)                                |
| 9                         | AT1G63430                                  | Leucine-rich repeat protein kinase family protein                               |
| 10                        | AT2G43710                                  | SSI2 (Suppressor of SA Insensitive 2)                                           |
| 11                        | AT3G62240                                  | SRH1 (RING/U-box superfamily protein)                                           |
| 12                        | AT1G10200                                  | WLIM1 (LIM domain-containing protein)                                           |
| 13                        | AT4G02280                                  | SUS3 (Sucrose synthase 3)                                                       |
| 14                        | AT2G28500                                  | LBD11 (LOB domain-containing protein 11)                                        |
| 15                        | AT2G39210                                  | PIC30 (Picloram Resistant 30)                                                   |
| 16                        | K02218                                     | Casein kinase 1                                                                 |
| 17                        | AT5G41970                                  | Metal-dependent protein hydrolase                                               |
| 18                        | K20891                                     | $\beta$ -glucuronosyltransferase                                                |
| 19                        | AT1G05010                                  | ACO4 (1-Aminocyclopropane-1-Carboxylic Acid Oxidase)                            |
